# Supplementary material
Source: PubMed Central journal article supplement (PMC2933218)
Supplement: NIHMS225838-supplement-Supp_Tables_1-6.pdf [file NIHMS225838-supplement-Supp_Tables_1-6.pdf]

**Table 1 (supplemental material). List of all 60 3D differential genes on Affymetrix HG-U133A and Rosetta chips (Method 1).**

| HG-U133A (60 genes) |             |           | Rosetta (55 genes) |          |                                                                                                                |
|---------------------|-------------|-----------|--------------------|----------|----------------------------------------------------------------------------------------------------------------|
| 1 dl                | 200801_x_at | ACTB      | 1 dl               | ACTB     | NM_001101 Actin, beta                                                                                          |
| 2 dl                | 208637_x_at | ACTN1     | 2 dl               | ACTN1    | BC003576 Actinin, alpha 1                                                                                      |
| 3 ul                | 203382_s_at | APOE      | 3 ul               | APOE     | NM_000041 Apolipoprotein E                                                                                     |
| 4 dl                | 219918_s_at | ASPM      | 4 dl               | FLJ10517 | NM_018123 asp (abnormal spindle)-like, microcephaly associated (Drosophila)                                    |
| 5 ul                | 205363_at   | BBOX1     | 5 ul               | BBOX     | NM_003986 Butyrobetaine (gamma), 2-oxoglutarate dioxygenase (gamma-butyrobetaine hydroxylase) 1                |
| 6 ue                | 221478_at   | BNIP3L    | 6 ue               | BNIP3L   | AL132665 BCL2/adenovirus E1B 19kDa interacting protein 3-like                                                  |
| 7 dl                | 218542_at   | C10orf3   | 7 dl               | FLJ10540 | NM_018131 Chromosome 10 open reading frame 3                                                                   |
| 8 ul                | 213508_at   | C14orf147 | 8 ul               |          | AA142942 Chromosome 14 open reading frame 147                                                                  |
| 9 dl                | 218456_at   | C1QDC1    |                    |          | NM_023925 C1q domain containing 1                                                                              |
| 10 dl               | 209714_s_at | CDKN3     | <b>not on chip</b> |          |                                                                                                                |
| 11 dl               | 204170_s_at | CKS2      | 9 dl               | CDKN3    | AF213033 Cyclin-dependent kinase inhibitor 3 (CDK2-associated dual specificity phosphatase)                    |
| 12 ul               | 209283_at   | CRYAB     | 10 dl              | CKS2     | NM_001827 CDC28 protein kinase regulatory subunit 2                                                            |
| 13 ul               | 205595_at   | DSG3      | 11 ul              | CRYAB    | AF007162 Crystallin, alpha B                                                                                   |
| 14 dl               | 204014_at   | DUSP4     | 12 ul              | DSG3     | NM_001944 Desmoglein 3 (pemphigus vulgaris antigen)                                                            |
| 15 ue               | 201842_s_at | EFEMP1    | 13 dl              | DUSP4    | NM_001394 Dual specificity phosphatase 4                                                                       |
| 16 ue               | 201694_s_at | EGR1      | 14 ue              | EFEMP1   | AI826799 EGF-containing fibulin-like extracellular matrix protein 1                                            |
| 17 dl               | 214805_at   | EIF4A1    | 15 ue              | EGR1     | NM_001964 Early growth response 1                                                                              |
| 18 ue               | 219599_at   | EIF4B     | 16 dl              | EIF4A1   | U79273 Eukaryotic translation initiation factor 4A, isoform 1                                                  |
| 19 dl               | 203499_at   | EPHA2     | 17 ue              | EIF4B    | NM_018507 eukaryotic translation initiation factor 4B                                                          |
| 20 dl               | 205014_at   | FGFBP1    | 18 dl              | EPHA2    | NM_004431 EPH receptor A2                                                                                      |
| 21 ue               | 206857_s_at | FKBP1B    | 19 dl              | HBP17    | NM_005130 Fibroblast growth factor binding protein 1                                                           |
| 22 dl               | 218349_s_at | FLJ10036  | 20 ue              | FKBP1B   | NM_004116 FK506 binding protein 1B, 12.6 kDa                                                                   |
| 23 ue               | 218361_at   | GOLPH3L   | 21 dl              | FLJ10036 | NM_017975 Zwlch                                                                                                |
| 24 ue               | 219093_at   | FLJ20701  | 22 ue              | FLJ10687 | NM_018178 Golgi phosphoprotein 3-like                                                                          |
| 25 ue               | 218880_at   | FOSL2     | 23 ue              | FLJ20701 | NM_017933 Hypothetical protein FLJ20701                                                                        |
| 26 dl               | 202580_x_at | FOXM1     | 24 ue              | FOSL2    | N36408 FOS-like antigen 2                                                                                      |
| 27 ul               | 201141_at   | GPNMB     | 25 dl              | FOXM1    | NM_021953 Forkhead box M1                                                                                      |
| 28 ue               | 200696_s_at | GSN       | 26 ul              | GPNMB    | NM_002510 Glycoprotein (transmembrane) nmb                                                                     |
| 29 dl               | 218663_at   | HCAP-G    | 27 ue              | vRK1     | NM_000177 Gelsolin (amyloidosis, Finnish type)                                                                 |
| 30 ue               | 202718_at   | IGFBP2    | <b>not on chip</b> |          | NM_022346 Chromosome condensation protein G                                                                    |
| 31 ue               | 203494_s_at | PIG8      | 28 ue              | IGFBP2   | NM_000597 Insulin-like growth factor binding protein 2, 36kDa                                                  |
| 32 de               | 212197_x_at | M-RIP     | 29 ue              | KIAA0092 | NM_014679 Translokoin                                                                                          |
| 33 ul               | 218559_s_at | MAFB      | 30 de              | KIAA0864 | AB020671 Myosin phosphatase-Rho interacting protein                                                            |
| 34 ul               | 213287_s_at | KRT10     | 31 ul              | KRML     | NM_005461 V-maf musculoaponeurotic fibrosarcoma oncogene homolog B (avian)                                     |
| 35 ue               | 209894_at   | LEPR      | 32 ul              | KRT10    | X14487 acidic (type I) cytokeratin 10                                                                          |
| 36 ue               | 219188_s_at | LRP16     | 33 ue              | LEPR     | U50748 Leptin receptor                                                                                         |
| 37 de               | 208433_s_at | LRP8      | 34 ue              | LRP16    | NM_014067 LRP16 protein                                                                                        |
| 38 dl               | 200790_at   | ODC1      | 35 de              | LRP8     | NM_017522 Low density lipoprotein receptor-related protein 8, apolipoprotein e receptor                        |
| 39 de               | 217997_at   | PHLDA1    | 36 dl              | ODC1     | NM_002539 Ornithine decarboxylase 1                                                                            |
| 40 ue               | 203407_at   | PPL       | 37 de              | PHLDA1   | AA576961 CDNA clone IMAGE:4514712, partial cds                                                                 |
| 41 ue               | 204547_at   | RAB40B    | 38 ue              | PPL      | NM_002705 Perioplakin                                                                                          |
| 42 dl               | 209773_s_at | RRM2      | 39 ue              | SEC4L    | NM_006822 RAB40B, member RAS oncogene family                                                                   |
| 43 ue               | 212698_s_at | SEPT10    | 40 dl              | RRM2     | BC001886 Ribonucleotide reductase M2 polypeptide                                                               |
| 44 ul               | 202376_at   | SERPINA3  | 41 ue              |          | BF966021 Septin 10                                                                                             |
| 45 dl               | 212190_at   | SERPINE2  | 42 ul              | SERPINA3 | NM_001085 Ser (or cys) proteinase inhibitor, clade A (alpha-1 antiproteinase, antitrypsin), member 3           |
| 46 de               | 201920_at   | SLC20A1   | <b>not on chip</b> |          | AL541302 Ser (or cys) proteinase inhibitor, clade E (nexin, plasminogen activator inhib type 1), member 2      |
| 47 ul               | 201416_at   | SOX4      | 43 de              | SLC20A1  | NM_005415 Solute carrier family 20 (phosphate transporter), member 1                                           |
| 48 ue               | 213667_at   | SRCAP     | 44 ul              | SOX4     | NM_003107 SRY (sex determining region Y)-box 4                                                                 |
| 49 ue               | 204675_at   | SRD5A1    | 45 ue              | SRCAP    | AB002307 Snf2-related CBP activator protein                                                                    |
| 50 dl               | 204092_s_at | STK6      | 46 ue              | SRD5A1   | NM_001047 Steroid-5-alpha-reductase, alpha polypeptide 1 (3-oxo-5 alpha-steroid delta 4-dehydrogenase alpha 1) |
| 51 ue               | 212459_x_at | SUCLG2    | 47 dl              | STK6     | NM_003600 Serine/threonine kinase 6                                                                            |
| 52 ul               | 212386_at   | TCF4      | 48 ue              | SUCLG2   | BF593940 Succinate-CoA ligase, GDP-forming, beta subunit                                                       |
| 53 de               | 201109_s_at | THBS1     | 49 ul              | TCF4     | AK021980 Transcription factor 4                                                                                |
| 54 dl               | 206467_x_at | TNFRSF6B  | 50 de              | THBS1    | AI812030 Thrombospondin 1                                                                                      |
| 55 dl               | 204033_at   | TRIP13    | 51 dl              | TNFRSF6B | NM_003823 Tumor necrosis factor receptor superfamily, member 6b, decoy                                         |
| 56 dl               | 201714_at   | TUBG1     | 52 dl              | TRIP13   | NM_004237 Thyroid hormone receptor interactor 13                                                               |
| 57 dl               | 203856_at   | VRK1      | 53 dl              | TUBG1    | NM_001070 Tubulin, gamma 1                                                                                     |
| 58 ue               | 219001_s_at | WDR32     | 54 dl              | VRK1     | NM_003384 Vaccinia related kinase 1                                                                            |
| 59 ue               | 218645_at   | ZNF277    | <b>not on chip</b> |          | NM_024345 WD repeat domain 32                                                                                  |
| 60 de               | 222108_at   |           | 55 ue              | ZNF277   | NM_021994 Zinc finger protein (C2H2 type) 277                                                                  |
|                     |             |           | <b>not on chip</b> |          | AC004010 Homo sapiens BAC clone GS1-99H8 from 12, complete sequence.                                           |

**Ue = up early, ul = up late, de = down early**

**Table 2 (supplemental material). Identities of the 21 genes coordinately induced early in 3D time course (Method 1).**

| Affy ID     | Name     | GenBank   | Description                                                                                  |
|-------------|----------|-----------|----------------------------------------------------------------------------------------------|
| 221478_at   | BNIP3L   | AL132665  | BCL2/adenovirus E1B 19kDa interacting protein 3-like                                         |
| 219599_at   | EIF4B    | NM_018507 | eukaryotic translation initiation factor 4B                                                  |
| 219188_s_at | LRP16    | NM_014067 | LRP16 protein                                                                                |
| 219093_at   | FLJ20701 | NM_017933 | hypothetical protein FLJ20701                                                                |
| 219001_s_at | MGC10765 | NM_024345 | hypothetical protein MGC10765                                                                |
| 218880_at   | FOSL2    | N36408    | FOS-like antigen 2                                                                           |
| 218645_at   | ZNF277   | NM_021994 | zinc finger protein (C2H2 type) 277                                                          |
| 218361_at   | GPP34R   | NM_018178 | GPP34-related protein                                                                        |
| 213667_at   | SRCAP    | AB002307  | Snf2-related CBP activator protein                                                           |
| 212698_s_at | SEPT10   | BF966021  | septin 10                                                                                    |
| 212459_x_at | SUCLG2   | BF593940  | succinate-CoA ligase, GDP-forming, beta subunit                                              |
| 209894_at   | LEPR     | U50748    | leptin receptor                                                                              |
| 206857_s_at | FKBP1B   | NM_004116 | FK506 binding protein 1B, 12.6 kDa                                                           |
| 204675_at   | SRD5A1   | NM_001047 | steroid-5-alpha-reductase, alpha ppt 1 (3-oxo-5 alpha-steroid delta 4-dehydrogenase alpha 1) |
| 204547_at   | RAB40B   | NM_006822 | RAB40B, member RAS oncogene family                                                           |
| 203494_s_at | KIAA0092 | NM_014679 | translokain                                                                                  |
| 203407_at   | PPL      | NM_002705 | periplakin                                                                                   |
| 202718_at   | IGFBP2   | NM_000597 | insulin-like growth factor binding protein 2, 36kDa                                          |
| 201842_s_at | EFEMP1   | A1826799  | EGF-containing fibulin-like extracellular matrix protein 1                                   |
| 201694_s_at | EGR1     | NM_001964 | early growth response 1                                                                      |
| 200696_s_at | GSN      | NM_000177 | gelsolin (amyloidosis, Finnish type)                                                         |

**Table 3 (supplemental material). Identities of the 6 genes coordinately repressed early in 3D time course (Method 1).**

| Affy ID     | Name    | GenBank   | Description                                                                   |
|-------------|---------|-----------|-------------------------------------------------------------------------------|
| 222108_at   |         | AC004010  | Homo sapiens BAC clone GS1-99H8 from 12                                       |
| 217997_at   | PHLDA1  | AA576961  | pleckstrin homology-like domain, family A, member 1                           |
| 214805_at   | EIF4A1  | U79273    | eukaryotic translation initiation factor 4A, isoform 1                        |
| 212197_x_at | M-RIP   | AB020671  | myosin phosphatase-Rho interacting protein                                    |
| 208433_s_at | LRP8    | NM_017522 | low density lipoprotein receptor-related protein 8, apolipoprotein e receptor |
| 201920_at   | SLC20A1 | NM_005415 | solute carrier family 20 (phosphate transporter), member 1                    |
| 201109_s_at | THBS1   | A1812030  | thrombospondin 1                                                              |

**Table 4 (supplemental material). Identities of the 11 genes coordinately induced late in 3D time course (Method 1).**

| Affy ID     | Name      | GenBank   | Description                                                                                |
|-------------|-----------|-----------|--------------------------------------------------------------------------------------------|
| 203382_s_at | APOE      | NM_000041 | Apolipoprotein E                                                                           |
| 205363_at   | BBOX1     | NM_003986 | Butyrobetaine (gamma), 2-oxoglutarate dioxygenase (gamma-butyrobetaine hydroxylase) 1      |
| 213508_at   | C14orf147 | AA142942  | Chromosome 14 open reading frame 147                                                       |
| 209283_at   | CRYAB     | AF007162  | Crystallin, alpha B                                                                        |
| 205595_at   | DSG3      | NM_001944 | Desmoglein 3 (pemphigus vulgaris antigen)                                                  |
| 201141_at   | GNPMB     | NM_002510 | Glycoprotein (transmembrane) nmb                                                           |
| 213287_s_at | KRT10     | X14487    | unnamed protein product; Human gene for acidic (type I) cytokeratin 10.                    |
| 218559_s_at | MAFB      | NM_005461 | V-maf musculoaponeurotic fibrosarcoma oncogene homolog B (avian)                           |
| 202376_at   | SERPINA3  | NM_001085 | Ser (or cys) proteinase inhibitor, clade A (alpha-1 antiproteinase, antitrypsin), member 3 |
| 201416_at   | SOX4      | NM_003107 | SRY (sex determining region Y)-box 4                                                       |
| 212386_at   | TCF4      | AK021980  | Transcription factor 4                                                                     |

**Table 5 (supplemental material). Identities of the 22 genes coordinately repressed late in 3D time course (Method 1).**

| Affy ID     | Name     | GenBank   | Description                                                                                      |
|-------------|----------|-----------|--------------------------------------------------------------------------------------------------|
| 200801_x_at | ACTB     | NM_001101 | Actin, beta                                                                                      |
| 208637_x_at | ACTN1    | BC003576  | Actinin, alpha 1                                                                                 |
| 219918_s_at | ASPM     | NM_018123 | Homo sapiens asp (abnormal spindle)-like, microcephaly associated (Drosophila) (ASPM)            |
| 218542_at   | C10orf3  | NM_018131 | Chromosome 10 open reading frame 3                                                               |
| 218456_at   | C1QDC1   | NM_023925 | C1q domain containing 1                                                                          |
| 209714_s_at | CDKN3    | AF213033  | Cyclin-dependent kinase inhibitor 3 (CDK2-associated dual specificity phosphatase)               |
| 204170_s_at | CKS2     | NM_001827 | CDC28 protein kinase regulatory subunit 2                                                        |
| 204014_at   | DUSP4    | NM_001394 | Dual specificity phosphatase 4                                                                   |
| 214805_at   | EIF4A1   | U79273    | Eukaryotic translation initiation factor 4A, isoform 1                                           |
| 203499_at   | EPHA2    | NM_004431 | EPH receptor A2                                                                                  |
| 205014_at   | FGFBP1   | NM_005130 | Fibroblast growth factor binding protein 1                                                       |
| 218349_s_at | FLJ10036 | NM_017975 | Zwilch                                                                                           |
| 202580_x_at | FOXM1    | NM_021953 | Forkhead box M1                                                                                  |
| 218663_at   | HCAP-G   | NM_022346 | Chromosome condensation protein G                                                                |
| 200790_at   | ODC1     | NM_002539 | Ornithine decarboxylase 1                                                                        |
| 209773_s_at | RRM2     | BC001886  | Ribonucleotide reductase M2 polypeptide                                                          |
| 212190_at   | SERPINE2 | AL541302  | Ser (or cys) proteinase inhibitor, clade E (nexin, plasminogen activator inhib type 1), member 2 |
| 204092_s_at | STK6     | NM_003600 | Serine/threonine kinase 6                                                                        |
| 206467_x_at | TNFRSF6B | NM_003823 | Tumor necrosis factor receptor superfamily, member 6b, decoy                                     |
| 204033_at   | TRIP13   | NM_004237 | Thyroid hormone receptor interactor 13                                                           |
| 201714_at   | TUBG1    | NM_001070 | Tubulin, gamma 1                                                                                 |
| 203856_at   | VRK1     | NM_003384 | Vaccinia related kinase 1                                                                        |

**Table 6 (supplemental material). Identities of 287 genes coordinately repressed late in 3D time course (Method 2).**

| Affymetrix ID | Name      | GenBank   | Description                                                                    |
|---------------|-----------|-----------|--------------------------------------------------------------------------------|
| 219918_s_at   | ASPM      | NM_018123 | (abnormal spindle)-like, microcephaly associated                               |
| 203939_at     | NT5E      | NM_002526 | 5'-nucleotidase, ecto (CD73)                                                   |
| 212552_at     | HPCAL1    | BE617588  | 601441509T1 NIH_MGC_65 Homo sapiens cDNA clone IMAGE:3845643 3', m             |
| 46167_at      | TTC4      | W22690    | 71G4 Human retina cDNA Tsp509I-cleaved sublibrary                              |
| 212186_at     | ACACA     | BE855983  | Acetyl-Coenzyme A carboxylase alpha                                            |
| 221505_at     | ANP32E    | AW612574  | Acidic (leucine-rich) nuclear phosphoprotein 32 family, member E               |
| 200801_x_at   | ACTB      | NM_001101 | Actin, beta                                                                    |
| 212363_x_at   | ACTG1     | AU145192  | Actin, gamma 1                                                                 |
| 208636_at     | ACTN1     | AI082078  | Actinin, alpha 1                                                               |
| 204244_s_at   | ASK       | NM_006716 | Activator of S phase kinase                                                    |
| 201096_s_at   | ARF4      | AL537042  | ADP-ribosylation factor 4                                                      |
| 202207_at     | ARL7      | NM_005737 | ADP-ribosylation factor-like 7                                                 |
| 208722_s_at   | ANAPC5    | BC001081  | Anaphase promoting complex subunit 5                                           |
| 200782_at     | ANXA5     | NM_001154 | Annexin A5                                                                     |
| 212584_at     | AQR       | AB011132  | Aquarius homolog (mouse)                                                       |
| 202655_at     | ARMET     | NM_006010 | Arginine-rich, mutated in early stage tumors                                   |
| 203545_at     | ALG8      | NM_024079 | Asparagine-linked glycosylation 8 homolog (yeast, alpha-1,3-glucosyltransferas |
| 202095_s_at   | BIRC5     | NM_001168 | Baculoviral IAP repeat-containing 5 (survivin)                                 |
| 207618_s_at   | BCS1L     | NM_004328 | BCS1-like (yeast)                                                              |
| 205733_at     | BLM       | NM_000057 | Bloom syndrome                                                                 |
| 205345_at     | BARD1     | NM_000465 | BRCA1 associated RING domain 1                                                 |
| 204032_at     | BCAR3     | NM_003567 | Breast cancer anti-estrogen resistance 3                                       |
| 217777_s_at   | HSPC121   | NM_016395 | Butyrate-induced transcript 1                                                  |
| 209563_x_at   | CALM1     | BC000454  | Calmodulin 1 (phosphorylase kinase, delta)                                     |
| 207243_s_at   | CALM2     | NM_001743 | Calmodulin 2 (phosphorylase kinase, delta)                                     |
| 200625_s_at   | CAP1      | NM_006367 | CAP, adenylate cyclase-associated protein 1 (yeast)                            |
| 202715_at     | CAD       | NM_004341 | Carbamoyl-phosphate synthetase 2, aspartate transcarbamylase, and dihydroc     |
| 212073_at     | CSNK2A1   | AI161318  | Casein kinase 2, alpha 1 polypeptide                                           |
| 218250_s_at   | CNOT7     | NM_013354 | CCR4-NOT transcription complex, subunit 7                                      |
| 201897_s_at   | CKS1B     | NM_001826 | CDC28 protein kinase regulatory subunit 1B                                     |
| 204170_s_at   | CKS2      | NM_001827 | CDC28 protein kinase regulatory subunit 2                                      |
| 204126_s_at   | CDC45L    | NM_003504 | CDC45 cell division cycle 45-like ( <i>S. cerevisiae</i> )                     |
| 203967_at     | CDC6      | U77949    | CDC6 cell division cycle 6 homolog ( <i>S. cerevisiae</i> )                    |
| 204510_at     | CDC7      | NM_003503 | CDC7 cell division cycle 7 ( <i>S. cerevisiae</i> )                            |
| 217996_at     | PHLDA1    | AA576961  | CDNA clone IMAGE:4514712, partial cds                                          |
| 203213_at     | CDC2      | AL524035  | Cell division cycle 2, G1 to S and G2 to M                                     |
| 204695_at     | CDC25A    | AI343459  | Cell division cycle 25A                                                        |
| 221436_s_at   | CDCA3     | NM_031299 | Cell division cycle associated 3                                               |
| 204962_s_at   | CENPA     | NM_001809 | Centromere protein A, 17kDa                                                    |
| 219030_at     | CGI-121   | NM_016058 | CGI-121 protein                                                                |
| 201946_s_at   | CCT2      | AL545982  | Chaperonin containing TCP1, subunit 2 (beta)                                   |
| 203976_s_at   | CHAF1A    | NM_005483 | Chromatin assembly factor 1, subunit A (p150)                                  |
| 218299_at     | C11orf24  | NM_022338 | Chromosome 11 open reading frame 24                                            |
| 60474_at      | C20orf42  | AA469071  | Chromosome 20 open reading frame 42                                            |
| 220094_s_at   | C6orf79   | NM_022102 | Chromosome 6 open reading frame 79                                             |
| 212714_at     | LOC113251 | AL050205  | C-Mpl binding protein                                                          |
| 211964_at     | COL4A2    | AK025912  | Collagen, type IV, alpha 2                                                     |
| 201112_s_at   | CSE1L     | NM_001316 | CSE1 chromosome segregation 1-like (yeast)                                     |
| 218451_at     | CDCP1     | NM_022842 | CUB domain-containing protein 1                                                |
| 218970_s_at   | CUTC      | NM_015960 | CutC copper transporter homolog ( <i>E.coli</i> )                              |

|             |              |           |                                                                                                   |
|-------------|--------------|-----------|---------------------------------------------------------------------------------------------------|
| 204826_at   | CCNF         | NM_001761 | Cyclin F                                                                                          |
| 204252_at   | CDK2         | M68520    | Cyclin-dependent kinase 2                                                                         |
| 209714_s_at | CDKN3        | AF213033  | Cyclin-dependent kinase inhibitor 3 (CDK2-associated dual specificity phosphatase)                |
| 218447_at   | DC13         | NM_020188 | DC13 protein                                                                                      |
| 208149_x_at | DDX11        | NM_030653 | DEAD/H (Asp-Glu-Ala-Asp/His) box polypeptide 11 (CHL1-like helicase homolog)                      |
| 201385_at   | DHX15        | NM_001358 | DEAH (Asp-Glu-Ala-His) box polypeptide 15                                                         |
| 220295_x_at | DEPDC1       | NM_017779 | DEP domain containing 1                                                                           |
| 202533_s_at | DHFR         | BC003584  | Dihydrofolate reductase                                                                           |
| 203230_at   | DVL1         | AF006011  | Dishevelled, dsh homolog 1 (Drosophila)                                                           |
| 202115_s_at | DKFZP564C186 | NM_015658 | DKFZP564C186 protein                                                                              |
| 221521_s_at | Pfs2         | BC003186  | DNA replication complex GINS protein PSF2                                                         |
| 221781_s_at | DNAJC10      | AL137648  | DnaJ (Hsp40) homolog, subfamily C, member 10                                                      |
| 204014_at   | DUSP4        | NM_001394 | Dual specificity phosphatase 4                                                                    |
| 208891_at   | DUSP6        | BC003143  | Dual specificity phosphatase 6                                                                    |
| 209932_s_at | DUT          | U90223    | DUTP pyrophosphatase                                                                              |
| 203105_s_at | DNM1L        | NM_012062 | Dynamamin 1-like                                                                                  |
| 208112_x_at | EHD1         | NM_006795 | EH-domain containing 1                                                                            |
| 221773_at   | ELK3         | AW575374  | ELK3, ETS-domain protein (SRF accessory protein 2)                                                |
|             |              |           | ELOVL family member 6, elongation of long chain fatty acids (FEN1/Elo2, SURF8) (yeast)            |
| 204256_at   | ELOVL6       | NM_024090 |                                                                                                   |
| 203499_at   | EPHA2        | NM_004431 | EPH receptor A2                                                                                   |
| 211603_s_at | ETV4         | U35622    | Ets variant gene 4 (E1A enhancer binding protein, E1AF)                                           |
| 204905_s_at | EEF1E1       | NM_004280 | Eukaryotic translation elongation factor 1 epsilon 1                                              |
| 201025_at   | EIF5B        | NM_015904 | Eukaryotic translation initiation factor 5B                                                       |
| 215136_s_at | EXOSC8       | AL050353  | Exosome component 8                                                                               |
| 211982_x_at | XPO6         | AL546600  | Exportin 6                                                                                        |
| 201889_at   | FAM3C        | NM_014888 | Family with sequence similarity 3, member C                                                       |
| 205014_at   | FGFBP1       | NM_005130 | Fibroblast growth factor binding protein 1                                                        |
| 212464_s_at | FN1          | X02761    | Fibronectin 1                                                                                     |
| 200859_x_at | FLNA         | NM_001456 | Filamin A, alpha (actin binding protein 280)                                                      |
| 208613_s_at | FLNB         | AV712733  | Filamin B, beta (actin binding protein 278)                                                       |
| 200894_s_at | FKBP4        | AA894574  | FK506 binding protein 4, 59kDa                                                                    |
| 204768_s_at | FEN1         | NM_004111 | Flap structure-specific endonuclease 1                                                            |
| 202580_x_at | FOXM1        | NM_021953 | Forkhead box M1                                                                                   |
| 213729_at   | FNBP3        | Z78308    | Formin binding protein 3                                                                          |
| 204420_at   | FOSL1        | BG251266  | FOS-like antigen 1                                                                                |
| 213594_x_at | FUSIP1       | AU130523  | FUS interacting protein (serine-arginine rich) 1                                                  |
| 216232_s_at | GCN1L1       | AI697055  | GCN1 general control of amino-acid synthesis 1-like 1 (yeast)                                     |
| 219539_at   | GEMIN6       | NM_024775 | Gem (nuclear organelle) associated protein 6                                                      |
| 221540_x_at | GTF2H2       | AF078847  | General transcription factor IIH, polypeptide 2, 44kDa                                            |
| 202722_s_at | GFPT1        | NM_002056 | Glutamine-fructose-6-phosphate transaminase 1                                                     |
| 213133_s_at | IQWD1        | BE908931  | Glycine cleavage system protein H (aminomethyl carrier)                                           |
| 218473_s_at | GLT25D1      | NM_024656 | Glycosyltransferase 25 domain containing 1                                                        |
| 200744_s_at | GNB1         | NM_002074 | Guanine nucleotide binding protein (G protein), beta polypeptide 1                                |
| 202487_s_at | H2AFV        | NM_012412 | H2A histone family, member V                                                                      |
| 200853_at   | H2AFZ        | NM_002106 | H2A histone family, member Z                                                                      |
| 210112_at   | HPS1         | U96721    | Hermansky-Pudlak syndrome 1                                                                       |
| 203138_at   | HAT1         | NM_003642 | Histone acetyltransferase 1                                                                       |
| 218092_s_at | HRB          | NM_004504 | HIV-1 Rev binding protein                                                                         |
| 200041_s_at | BAT1         | NM_004640 | HLA-B associated transcript 1                                                                     |
| 216607_s_at | CYP51P2      | U40053    | Human lanosterol 14-alpha demethylase (CYP51P2) processed pseudogene, complete cds                |
|             | MT1F;        |           |                                                                                                   |
| 217165_x_at | MGC32732     | M10943    | human metallothionein-I $\epsilon$ ; Human metallothionein-I $\epsilon$ gene (hMT-I $\epsilon$ ). |
| 202347_s_at | HIP2         | AB022435  | Huntingtin interacting protein 2                                                                  |
| 203040_s_at | HMBS         | NM_000190 | Hydroxymethylbilane synthase                                                                      |

|             |               |           |                                                                                                                                         |
|-------------|---------------|-----------|-----------------------------------------------------------------------------------------------------------------------------------------|
| 221849_s_at | LOC90379      | AI073983  | Hypothetical protein BC002926                                                                                                           |
| 218726_at   | DKFZp762E1312 | NM_018410 | Hypothetical protein DKFZp762E1312                                                                                                      |
| 218073_s_at | FLJ10407      | NM_018087 | Hypothetical protein FLJ10407                                                                                                           |
| 213008_at   | FLJ10719      | BG478677  | Hypothetical protein FLJ10719                                                                                                           |
| 218051_s_at | FLJ12442      | NM_022908 | Hypothetical protein FLJ12442                                                                                                           |
| 207856_s_at | FLJ20297      | NM_017951 | Hypothetical protein FLJ20297                                                                                                           |
| 219002_at   | FLJ21901      | NM_024622 | Hypothetical protein FLJ21901                                                                                                           |
| 218300_at   | MGC4606       | NM_024516 | Hypothetical protein MGC4606                                                                                                            |
| 218847_at   | IMP-2         | NM_006548 | IGF-II mRNA-binding protein 2                                                                                                           |
| 204169_at   | IMPDH1        | NM_000883 | IMP (inosine monophosphate) dehydrogenase 1                                                                                             |
| 203011_at   | IMPA1         | NM_005536 | Inositol(myo)-1(or 4)-monophosphatase 1                                                                                                 |
| 201474_s_at | ITGA3         | NM_002204 | Integrin, alpha 3 (antigen CD49C, alpha 3 subunit of VLA-3 receptor)                                                                    |
| 201125_s_at | ITGB5         | NM_002213 | Integrin, beta 5                                                                                                                        |
| 208930_s_at | ILF3          | BG032366  | Interleukin enhancer binding factor 3, 90kDa                                                                                            |
| 201587_s_at | IRAK1         | NM_001569 | Interleukin-1 receptor-associated kinase 1                                                                                              |
| 208881_x_at | IDI1          | BC005247  | Isopentenyl-diphosphate delta isomerase                                                                                                 |
| 204615_x_at | IDI1          | NM_004508 | Isopentenyl-diphosphate delta isomerase                                                                                                 |
| 200700_s_at | KDELR2        | NM_006854 | KDEL (Lys-Asp-Glu-Leu) endoplasmic reticulum protein retention receptor 2                                                               |
| 212396_s_at | KIAA0090      | D42044    | KIAA0090 protein                                                                                                                        |
| 212832_s_at | ch-TOG        | AI143124  | KIAA0097 gene product                                                                                                                   |
| 216251_s_at | KIAA0153      | BF965437  | KIAA0153 protein                                                                                                                        |
| 206102_at   | KIAA0186      | NM_021067 | KIAA0186 gene product                                                                                                                   |
| 212898_at   | KIAA0406      | AB007866  | KIAA0406 gene product                                                                                                                   |
| 213088_s_at | KIAA0974      | BF240590  | KIAA0974                                                                                                                                |
| 217196_s_at | KIAA1078      | AL110158  | KIAA1078 protein                                                                                                                        |
| 221901_at   | KIAA1644      | BF516072  | KIAA1644 protein                                                                                                                        |
| 211519_s_at | KIF2C         | AY026505  | Kinesin family member 2C                                                                                                                |
| 218355_at   | KIF4A         | NM_012310 | Kinesin family member 4A                                                                                                                |
| 204162_at   | KNTC2         | NM_006101 | Kinetochores associated 2                                                                                                               |
| 200650_s_at | LDHA          | NM_005566 | Lactate dehydrogenase A                                                                                                                 |
| 202267_at   | LAMC2         | NM_005562 | Laminin, gamma 2                                                                                                                        |
| 221641_s_at | ACATE2        | AF241787  | Likely ortholog of mouse acyl-Coenzyme A thioesterase 2, mitochondrial                                                                  |
| 202068_s_at | LDLR          | NM_000527 | Low density lipoprotein receptor (familial hypercholesterolemia)                                                                        |
| 203007_x_at | LYPLA1        | AF077198  | Lysophospholipase I                                                                                                                     |
| 209397_at   | ME2           | BC000147  | Malic enzyme 2, NAD(+)-dependent, mitochondrial                                                                                         |
| 204825_at   | MELK          | NM_014791 | Maternal embryonic leucine zipper kinase                                                                                                |
| 202107_s_at | MCM2          | NM_004526 | MCM2 minichromosome maintenance deficient 2, mitotin ( <i>S. cerevisiae</i> )                                                           |
| 201555_at   | MCM3          | NM_002388 | MCM3 minichromosome maintenance deficient 3 ( <i>S. cerevisiae</i> )                                                                    |
| 201930_at   | MCM6          | NM_005915 | MCM6 minichromosome maintenance deficient 6 (MIS5 homolog, <i>S. pombe</i> ) ( <i>S. pombe</i> )                                        |
| 210983_s_at | MCM7          | AF279900  | MCM7 minichromosome maintenance deficient 7 ( <i>S. cerevisiae</i> )                                                                    |
| 208581_x_at | MT1X          | NM_005952 | Metallothionein 1X                                                                                                                      |
| 212185_x_at | MT2A          | NM_005953 | Metallothionein 2A                                                                                                                      |
| 202309_at   | MTHFD1        | NM_005956 | Methylenetetrahydrofolate dehydrogenase (NADP+ dependent) 1, methenyltetrahydrofolate cyclohydrolase, formyltetrahydrofolate synthetase |
| 209265_s_at | METTL3        | BC001650  | Methyltransferase like 3                                                                                                                |
| 222216_s_at | MRPL17        | AK026857  | Mitochondrial ribosomal protein L17                                                                                                     |
| 208787_at   | MRPL3         | BC003375  | Mitochondrial ribosomal protein L3                                                                                                      |
| 218890_x_at | MRPL35        | NM_016622 | Mitochondrial ribosomal protein L35                                                                                                     |
| 206571_s_at | MAP4K4        | NM_004834 | Mitogen-activated protein kinase kinase kinase kinase 4                                                                                 |
| 219588_s_at | MTB           | NM_017760 | More than blood homolog                                                                                                                 |
| 218463_s_at | MUS81         | NM_025128 | MUS81 endonuclease homolog (yeast)                                                                                                      |
| 201153_s_at | MBNL1         | NM_021038 | Muscleblind-like ( <i>Drosophila</i> )                                                                                                  |
| 202911_at   | MSH6          | NM_000179 | MutS homolog 6 ( <i>E. coli</i> )                                                                                                       |
| 211926_s_at | MYH9          | AI827941  | Myosin, heavy polypeptide 9, non-muscle                                                                                                 |
| 218133_s_at | NIF3L1        | NM_021824 | NIF3 NGG1 interacting factor 3-like 1 ( <i>S. pombe</i> )                                                                               |

|             |                |           |                                                                                  |
|-------------|----------------|-----------|----------------------------------------------------------------------------------|
| 201970_s_at | NASP           | NM_002482 | Nuclear autoantigenic sperm protein (histone-binding)                            |
| 218269_at   | RNASE3L        | NM_013235 | Nuclear RNase III Drosha                                                         |
| 211951_at   | NOLC1          | D21262    | Nucleolar and coiled-body phosphoprotein 1                                       |
| 218039_at   | NUSAP1         | NM_016359 | Nucleolar and spindle associated protein 1                                       |
| 217962_at   | NOLA3          | NM_018648 | Nucleolar protein family A, member 3 (H/ACA small nucleolar RNPs)                |
| 218768_at   | NUP107         | NM_020401 | Nucleoporin 107kDa                                                               |
| 202097_at   | NUP153         | NM_005124 | Nucleoporin 153kDa                                                               |
| 212691_at   | NUP188         | AW131863  | Nucleoporin 188kDa                                                               |
| 212247_at   | NUP205         | AW008531  | Nucleoporin 205kDa                                                               |
| 218622_at   | NUP37          | NM_024057 | Nucleoporin 37kDa                                                                |
| 219347_at   | NUDT15         | NM_018283 | Nudix (nucleoside diphosphate linked moiety X)-type motif 15                     |
| 200790_at   | ODC1           | NM_002539 | Ornithine decarboxylase 1                                                        |
| 200906_s_at | KIAA0992       | AK025843  | Palladin                                                                         |
| 214121_x_at | PDLIM7         | AA086229  | PDZ and LIM domain 7 (enigma)                                                    |
| 218014_at   | PCNT1          | NM_024844 | Pericentrin 1                                                                    |
| 208680_at   | PRDX1          | L19184    | Peroxiredoxin 1                                                                  |
| 201619_at   | PRDX3          | NM_006793 | Peroxiredoxin 3                                                                  |
| 200738_s_at | PGK1           | NM_000291 | Phosphoglycerate kinase 1                                                        |
| 208447_s_at | PRPS1          | NM_002764 | Phosphoribosyl pyrophosphate synthetase 1                                        |
|             |                |           | Phosphoribosylaminoimidazole carboxylase, phosphoribosylaminoimidazole           |
|             |                |           | succinocarboxamide synthetase                                                    |
| 201014_s_at | PAICS          | NM_006452 | pitriylsin metalloproteinase 1                                                   |
| 205273_s_at | PITRM1         | NM_014968 | Pituitary tumor-transforming 1                                                   |
| 203554_x_at | PTTG1          | NM_004219 | Plasminogen activator, urokinase receptor                                        |
| 210845_s_at | PLAUR          | U08839    | Pleckstrin 2                                                                     |
| 218644_at   | PLEK2          | NM_016445 | PMS1 postmeiotic segregation increased 1 ( <i>S. cerevisiae</i> )                |
| 213677_s_at | PMS1           | BG434893  | Polo-like kinase 1 ( <i>Drosophila</i> )                                         |
| 202240_at   | PLK1           | NM_005030 | Poly (ADP-ribose) polymerase family, member 2                                    |
| 214086_s_at | PARP2          | AK001980  | Polyhomeotic-like 2 ( <i>Drosophila</i> )                                        |
| 200919_at   | PHC2           | NM_004427 | Polymerase (DNA directed), alpha                                                 |
| 204835_at   | POLA           | NM_016937 | Polymerase (DNA directed), epsilon 3 (p17 subunit)                               |
| 208828_at   | POLE3          | BC004170  | Polymerase (DNA directed), theta                                                 |
| 219510_at   | POLQ           | NM_006596 | Polymerase (RNA) mitochondrial (DNA directed)                                    |
| 203782_s_at | POLRMT         | NM_005035 | predicted protein of HQ0998; <i>Homo sapiens</i> PRO0998 mRNA, complete cds.     |
| 211162_x_at | SCD            | AF116616  |                                                                                  |
|             | FN1; CIG; MSF; |           |                                                                                  |
| 210495_x_at | FINC; LETS     | AF130095  | predicted protein of HQ2841; <i>Homo sapiens</i> clone FLC0562 PRO2841 mRNA,     |
| 209482_at   | POP7           | BC001430  | Processing of precursor 7, ribonuclease P subunit ( <i>S. cerevisiae</i> )       |
| 202185_at   | PLOD3          | NM_001084 | Procollagen-lysine, 2-oxoglutarate 5-dioxygenase 3                               |
| 200634_at   | PFN1           | NM_005022 | Profilin 1                                                                       |
| 217861_s_at | PREB           | NM_013388 | Prolactin regulatory element binding                                             |
| 200039_s_at | PSMB2          | NM_002794 | Proteasome (prosome, macropain) subunit, beta type, 2                            |
| 210543_s_at | PRKDC          | U34994    | Protein kinase, DNA-activated, catalytic polypeptide                             |
| 202313_at   | PPP2R2A        | NM_002717 | Protein phosphatase 2 (formerly 2A), regulatory subunit B (PR 52), alpha isoform |
| 218009_s_at | PRC1           | NM_003981 | Protein regulator of cytokinesis 1                                               |
| 209161_at   | PRPF4          | AI184802  | PRP4 pre-mRNA processing factor 4 homolog (yeast)                                |
| 209780_at   | PHTF2          | AL136883  | Putative homeodomain transcription factor 2                                      |
| 222077_s_at | RACGAP1        | AU153848  | Rac GTPase activating protein 1                                                  |
| 202483_s_at | RANBP1         | NM_002882 | RAN binding protein 1                                                            |
| 218526_s_at | RANGNRF        | NM_014185 | RAN guanine nucleotide release factor (RANGNRF)                                  |
| 209444_at   | RAP1GDS1       | BC001851  | RAP1, GTP-GDP dissociation stimulator 1                                          |
| 218585_s_at | RAMP           | NM_016448 | RA-regulated nuclear matrix-associated protein                                   |
| 204127_at   | RFC3           | BC000149  | Replication factor C (activator 1) 3, 38kDa                                      |
| 209507_at   | RPA3           | BC005264  | Replication protein A3, 14kDa                                                    |
| 202052_s_at | RAI14          | NM_015577 | Retinoic acid induced 14                                                         |
| 212724_at   | ARHE           | BG054844  | Rho family GTPase 3                                                              |

|             |           |           |                                                                                                                                                    |
|-------------|-----------|-----------|----------------------------------------------------------------------------------------------------------------------------------------------------|
| 211716_x_at | ARHGDI A  | BC005851  | Rho GDP dissociation inhibitor (GDI) alpha                                                                                                         |
| 213867_x_at | ARHGEF10  | AA809056  | Rho guanine nucleotide exchange factor (GEF) 10                                                                                                    |
| 203022_at   | RNASEH2A  | NM_006397 | Ribonuclease H2, large subunit                                                                                                                     |
| 201890_at   | RRM2      | NM_001034 | Ribonucleotide reductase M2 polypeptide                                                                                                            |
| 218564_at   | RFWD3     | BC002574  | Ring finger and WD repeat domain 3                                                                                                                 |
| 218738_s_at | RNF138    | NM_016271 | Ring finger protein 138                                                                                                                            |
| 211686_s_at | RBM13     | AF251062  | RNA binding motif protein 13                                                                                                                       |
| 212033_at   | RBM25     | BE466128  | RNA binding motif protein 25                                                                                                                       |
| 206499_s_at | CHC1      | NM_001269 | RNA, U17D small nucleolar                                                                                                                          |
| 201583_s_at | SEC23B    | NM_006363 | Sec23 homolog B ( <i>S. cerevisiae</i> )<br>Serine (or cysteine) proteinase inhibitor, clade E (nexin, plasminogen activator<br>member 2           |
| 212190_at   | SERPINE2  | AL541302  |                                                                                                                                                    |
| 202786_at   | STK39     | NM_013233 | Serine threonine kinase 39 (STE20/SPS1 homolog, yeast)                                                                                             |
| 201225_s_at | SRRM1     | NM_005839 | Serine/arginine repetitive matrix 1                                                                                                                |
| 202693_s_at | STK17A    | NM_004760 | Serine/threonine kinase 17a (apoptosis-inducing)                                                                                                   |
| 204092_s_at | STK6      | NM_003600 | Serine/threonine kinase 6                                                                                                                          |
| 202200_s_at | SRPK1     | NM_003137 | SFRS protein kinase 1                                                                                                                              |
| 219256_s_at | SH3TC1    | NM_018986 | SH3 domain and tetratricopeptide repeats 1                                                                                                         |
| 211456_x_at |           | AF333388  | Similar to 60S ribosomal protein L35                                                                                                               |
| 201139_s_at | SSB       | NM_003142 | Sjogren syndrome antigen B (autoantigen La)                                                                                                        |
| 217786_at   | SKB1      | NM_006109 | SKB1 homolog ( <i>S. pombe</i> )                                                                                                                   |
| 214734_at   | SLAC2-B   | AB014524  | SLAC2-B                                                                                                                                            |
| 206055_s_at | SNRPA1    | NM_003090 | Small nuclear ribonucleoprotein polypeptide A'                                                                                                     |
| 203832_at   | SNRPF     | NM_003095 | Small nuclear ribonucleoprotein polypeptide F                                                                                                      |
| 201664_at   | SMC4L1    | AL136877  | SMC4 structural maintenance of chromosomes 4-like 1 (yeast)                                                                                        |
| 207390_s_at | SMTN      | NM_006932 | Smoothelin                                                                                                                                         |
| 202043_s_at | SMS       | NM_004595 | Spermine synthase                                                                                                                                  |
| 203625_x_at | SKP2      | BG105365  | S-phase kinase-associated protein 2 (p45)                                                                                                          |
| 200687_s_at | SF3B3     | NM_012426 | Splicing factor 3b, subunit 3, 130kDa                                                                                                              |
| 213742_at   | SFRS11    | AW241752  | Splicing factor, arginine/serine-rich 11                                                                                                           |
| 201696_at   | SFRS4     | NM_005626 | Splicing factor, arginine/serine-rich 4                                                                                                            |
| 204011_at   | SPRY2     | NM_005842 | Sprouty homolog 2 ( <i>Drosophila</i> )                                                                                                            |
| 209218_at   | SQLE      | AF098865  | Squalene epoxidase                                                                                                                                 |
| 212845_at   | SAMD4     | AB028976  | Sterile alpha motif domain containing 4                                                                                                            |
| 209478_at   | STRA13    | U95006    | Stimulated by retinoic acid 13 homolog (mouse)                                                                                                     |
| 221845_s_at | SKD3      | AI655698  | Suppressor of potassium transport defect 3                                                                                                         |
| 217815_at   | SUPT16H   | NM_007192 | Suppressor of Ty 16 homolog ( <i>S. cerevisiae</i> )<br>SWI/SNF related, matrix associated, actin dependent regulator of chromatin, su<br>member 4 |
| 212520_s_at | SMARCA4   | AI684141  |                                                                                                                                                    |
| 204078_at   | SC65      | NM_006455 | Synaptonemal complex protein SC65                                                                                                                  |
| 41037_at    | TEAD4     | U63824    | TEA domain family member 4                                                                                                                         |
| 208864_s_at | TXN       | AF313911  | Thioredoxin                                                                                                                                        |
| 221253_s_at | TXNDC5    | NM_030810 | Thioredoxin domain containing 5                                                                                                                    |
| 207668_x_at | TXNDC7    | NM_005742 | Thioredoxin domain containing 7 (protein disulfide isomerase)                                                                                      |
| 207891_s_at | TREX2     | NM_017518 | three prime repair exonuclease 2                                                                                                                   |
| 203432_at   | TMPO      | AW272611  | Thymopoietin                                                                                                                                       |
| 204033_at   | TRIP13    | NM_004237 | Thyroid hormone receptor interactor 13                                                                                                             |
| 203046_s_at | TIMELESS  | NM_003920 | Timeless homolog ( <i>Drosophila</i> )                                                                                                             |
| 219258_at   | FLJ20516  | NM_017858 | Timeless-interacting protein                                                                                                                       |
| 219169_s_at | TFB1M     | NM_016020 | Transcription factor B1, mitochondrial                                                                                                             |
| 204822_at   | TTK       | NM_003318 | TTK protein kinase                                                                                                                                 |
| 201714_at   | TUBG1     | NM_001070 | Tubulin, gamma 1                                                                                                                                   |
| 218368_s_at | TNFRSF12A | NM_016639 | Tumor necrosis factor receptor superfamily, member 12A                                                                                             |
| 206467_x_at | TNFRSF6B  | NM_003823 | Tumor necrosis factor receptor superfamily, member 6b, decoy                                                                                       |
| 200599_s_at | TRA1      | NM_003299 | Tumor rejection antigen (gp96) 1                                                                                                                   |



|             |         |           |                                                                             |
|-------------|---------|-----------|-----------------------------------------------------------------------------|
| 201020_at   | YWHAH   | NM_003405 | Tyrosine 3-monooxygenase/tryptophan 5-monooxygenase activation protein, e   |
| 219960_s_at | UCHL5   | NM_015984 | Ubiquitin carboxyl-terminal hydrolase L5                                    |
| 202413_s_at | USP1    | NM_003368 | Ubiquitin specific protease 1                                               |
| 200964_at   | UBE1    | NM_003334 | Ubiquitin-activating enzyme E1 (A1S9T and BN75 temperature sensitivity comp |
| 201523_x_at | UBE2N   | BE262760  | Ubiquitin-conjugating enzyme E2N (UBC13 homolog, yeast)                     |
| 202528_at   | GALE    | NM_000403 | UDP-galactose-4-epimerase                                                   |
| 209340_at   | UAP1    | S73498    | UDP-N-acteylglucosamine pyrophosphorylase 1                                 |
| 200627_at   | TEBP    | BC003005  | Unactive progesterone receptor, 23 kD                                       |
| 219555_s_at | BM039   | NM_018455 | Uncharacterized bone marrow protein BM039                                   |
| 203234_at   | UPP1    | NM_003364 | Uridine phosphorylase 1                                                     |
| 209825_s_at | UCK2    | BC002906  | Uridine-cytidine kinase 2                                                   |
| 203856_at   | VRK1    | NM_003384 | Vaccinia related kinase 1                                                   |
| 207163_s_at | AKT1    | NM_005163 | V-akt murine thymoma viral oncogene homolog 1                               |
| 200931_s_at | VCL     | NM_014000 | Vinculin                                                                    |
| 210561_s_at | WSB1    | AL110243  | WD repeat and SOCS box-containing 1                                         |
| 222037_at   | MCM4    | AI859865  | wm21f03.x1 NCI_CGAP_Ut4 Homo sapiens cDNA clone IMAGE:2436605               |
| 209053_s_at | WHSC1   | AF083389  | Wolf-Hirschhorn syndrome candidate 1                                        |
| 217821_s_at | WBP11   | AF118023  | WW domain binding protein 11                                                |
| 216299_s_at | XRCC3   | AK022829  | X-ray repair complementing defective repair in Chinese hamster cells 3      |
| 204026_s_at | ZWINT   | NM_007057 | ZW10 interactor                                                             |
| 217946_s_at | SAE1    | NM_016402 |                                                                             |
| 216336_x_at |         | AL031602  |                                                                             |
| 215714_s_at | SMARCA4 | AF254822  |                                                                             |
| 213175_s_at | SNRPB   | AL049650  |                                                                             |
